# Supplementary material for: Characteristic genes in THP-1 derived macrophages infected with Mycobacterium tuberculosis H37Rv strain identified by integrating bioinformatics methods
Source: PubMed Central journal article supplement — Int J Mol Med. 2019 Jul 30;44(4):1243–54. doi: 10.3892/ijmm.2019.4293 (PMC6713430; doi:10.3892/ijmm.2019.4293), 2019-07-30
Supplement: Supplementary_Data.pdf [file Supplementary_Data.pdf]

Figure S1. The relationship between the three PPI networks. (A) The PPI network of all DEGs in meta-analysis consists of 275 nodes and 2,038 edges. (B) PPI network extracted from (A) by Degree Centrality consists of 56 nodes and 644 edges. (C) The PPI network extracted from (B) by MCODE consists of 32 nodes and 446 edges. PPI, protein-protein interaction; dEGs, differentially expressed genes.

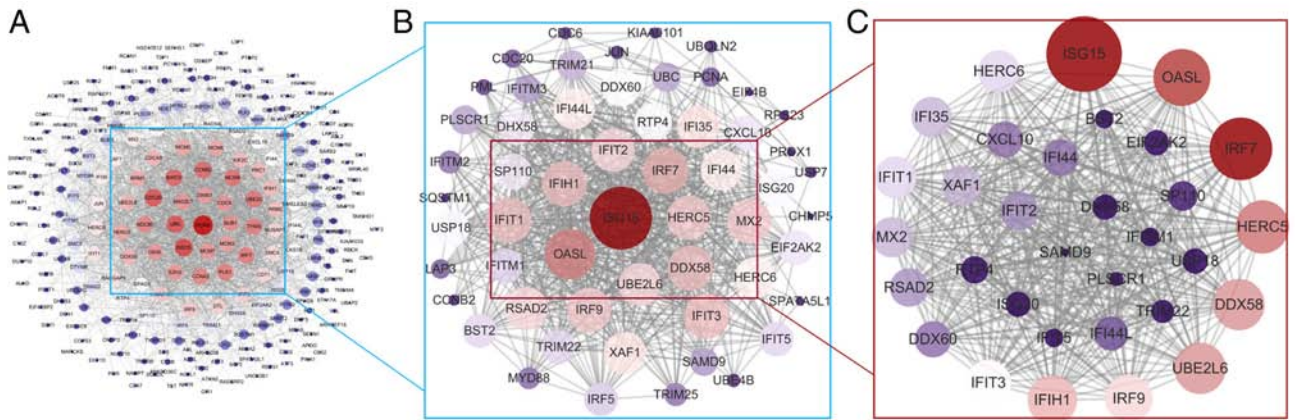

Table SI. Sequences of primers used.

---

|                |                                                                                 |
|----------------|---------------------------------------------------------------------------------|
| ISG15          | Forward: 5'-CGCAGATCACCCAGAAGATCG-3'<br>Reverse: 5'-TTCGTCCGATTTGTCCACCA-3'     |
| OASL           | Forward: 5'-AAGGTAGTCAAGGTGGGCTC-3'<br>Reverse: 5'-CTCCTGGAAGCTGTGGAAAC-3'      |
| IRF7           | Forward: 5'-GCTGGACGTGACCATCATGTA-3'<br>Reverse: 5'-GGGCCGTATAGGAACGTGC-3'      |
| DDX58          | Forward: 5'-TGCGAATCAGATCCCAGTGTA-3'<br>Reverse: 5'-TGCCTGTA ACTCTATACCCATGT-3' |
| $\beta$ -actin | Forward: 5'-CCTGGCACCCAGCACAAT-3'<br>Reverse: 5'-GCCGATCCACACGGAGTACT-3'        |

---

ISG15, interferon-stimulated gene 15; OASL, 2'-5-oligoadenylate synthetase like; IRF7, interferon regulatory factor 7; DDX58, DExD/H-box helicase 58.

---

Table SII. Thermocycling conditions for reverse transcription-quantitative PCR.

| Step                 | Temperature (°C) | Reaction time (sec) | Number of cycles |
|----------------------|------------------|---------------------|------------------|
| Initial denaturation | 95               | 30                  | 1                |
| Denaturation         | 95               | 10                  | 40               |
| Annealing            | 60               | 30                  |                  |
| Elongation           | 95               | 15                  |                  |
| Final extension      | 60               | 60                  | 1                |
|                      | 95               | 15                  |                  |
